# Comparative metaproteomics demonstrates different views on the complex granular sludge microbiome

Hugo B.C. Kleikamp<sup>1\*</sup>, Dennis Grouzdev<sup>2</sup>, Pim Schaasberg<sup>1</sup>, Ramon van Valderen<sup>1</sup>, Ramon van der Zwaan<sup>1</sup>, Roel van de Wijngaart<sup>1</sup>, Yuemei Lin<sup>1</sup>, Ben Abbas<sup>1</sup>, Mario Pronk<sup>1</sup>, Mark C.M. van Loosdrecht<sup>1</sup> and Martin Pabst<sup>1\*</sup>

<sup>1</sup>Delft University of Technology, Department of Biotechnology, Delft, The Netherlands; <sup>2</sup>SciBear OU, Tallinn, Estonia.

\*Contacts: [h.b.c.kleikamp@tudelft.nl](mailto:h.b.c.kleikamp@tudelft.nl) and [m.pabst@tudelft.nl](mailto:m.pabst@tudelft.nl)

## ABSTRACT

The tremendous progress in sequencing technologies has made 16S amplicon and whole metagenome sequencing routine in microbiome studies. Furthermore, advances in mass spectrometric techniques has expanded conventional proteomics into the field of microbial ecology. Commonly referred to as metaproteomics, this approach measures the gene products (*i.e.*, proteins) to subsequently identify the actively-expressed metabolic pathways and the protein-biomass composition of complete microbial communities.

However, more systematic studies on metaproteomic and genomic approaches are urgently needed, to determine the orthogonal character of these approaches. Here we describe a deep, comparative metaproteomic study on the complex aerobic granular sludge microbiome obtained from different wastewater treatment plants. Thereby, we demonstrate the different views that can be obtained on the central nutrient-removing organisms depending on the 'omic' approach and reference sequence databases. Furthermore, we demonstrate a 'homogenized' Genome Taxonomy Database (GTDB) that subsequently enables a more accurate interpretation of data from different omics approaches. Ultimately, our systematic study underscores the importance of metaproteomics in the characterization of complex microbiomes; and the necessity of accurate reference sequence databases to improve the comparison between approaches and accuracy in scientific reporting.

## KEY WORDS

Metaproteomics, whole metagenomic sequencing, 16S amplicon sequencing, microbial communities, granular sludge microbiome.

## INTRODUCTION

Microbial communities play a central role in the global biogeochemical cycles and their close association with humans has a direct impact on health and disease [1-5]. Moreover, microbial communities are increasingly used in biotechnology and engineering such as for the degradation and removal of pollutants from wastewater and soils, or for the production of novel materials, greener chemicals, or energy to support a bio-based society [6-11]. Of more recent interest are also synthetic and engineered communities with the aim to enable fundamentally novel applications [12]. The complex nature of microbial interactions, however, still hampers the design of specific functions in such environments [12, 13]. Nevertheless, the need to better understand global microbial processes and the desire to harness microbial communities for industrial applications asks for methods that resolve the taxonomic composition and their underlying metabolic pathways. Therefore, systems biology approaches that provide molecular level information from such complex environments become increasingly important across biotechnology and microbial ecology.

The emergence of next-generation sequencing (NGS) technologies has enabled large-scale genomic studies of microbial communities directly from their natural environments. The simplest of these approaches is 16S rRNA gene sequencing (commonly referred to 16S amplicon sequencing). 16S rRNA genes are highly-conserved between different bacteria and archaea and, thus, are widely-used in taxonomic profiling of environmental communities [14-19]. However, this approach suffers from the variable 16S gene copy numbers [20-22] and primer efficiencies across microbes [23, 24]. Furthermore, metabolic functions are only inferred from prior taxonomic knowledge and thus remain purely predictive [25, 26]. Alternatively, whole metagenome ('shotgun') sequencing (often referred to as metagenomics) targets the complete genomes of all community members. This approach provides a high taxonomic resolution and it discloses the metabolic potential of individual community members [27-29]. The obtained metagenome, however, may not only encompass the active microbial population, but can also cover free DNA as well as DNA from dead and dormant microbes [30].

Advances in high-resolution mass spectrometry and the increased ease to construct proteome sequence databases ultimately enabled deep proteomic studies of complete microbial communities. Consequently, metaproteomics has emerged as one of the most promising post-genomic approaches [31-38]. Most importantly, because metaproteomics measures the gene products (*i.e.*, proteins) it provides an orthogonal view on the microbial community. The obtained microbial composition correlates to the amount of protein (proteinaceous biomass) rather than to the number of cells, as obtained by metagenomics [35, 39]. Therefore, metaproteomic data resemble more closely the metabolic capacity of individual community members [40-42]. Moreover, metaproteomics allows to measure molecular level

1 information such as protein modifications that cannot be obtained from genomic information alone [43, 44]. However, in contrast to DNA,  
2 proteins cannot be amplified prior to analysis, and peptide sequencing is performed consecutively (or only at low multiplexing level) rather  
3 than (all sequences) in parallel. Therefore, the depth of information that can be obtained by metaproteomics is dependent on the  
4 taxonomic complexity and the mass spectrometric effort taken to sequence the sample [31, 32, 45]. The dependency of metaproteomic  
5 performance on community complexity has been investigated more in detail by Lohmann and co-workers only recently [46].

6 From the many applications in industrial biotechnology, agriculture or medicine, microbial water treatment is perhaps one of the fastest  
7 growing areas. For example, the widely-used activated sludge wastewater treatment technology is a biological process that with the aid  
8 of a complex microbiome aims to purify wastewater [47, 48]. A recent advancement, known as aerobic granular sludge (AGS) technology,  
9 has the advantage of operating with reduced space and energy requirements [6, 27-30]. The microbes form dense granules following the  
10 production of extracellular polymeric substances [49-51]. Consequently, the granules allow a settling speed and a higher biomass density.  
11 In microbial wastewater treatment, several synergistic roles for nutrient removal have been identified that include phosphate-accumulating  
12 organisms (PAO), glycogen-accumulating organisms (GAO), nitrate-oxidizing bacteria (NOB), ammonia-oxidizing bacteria (AOB), and  
13 nitrate reducers (NR) [52-54]. Although microbial wastewater treatment has a long history, the exact molecular-level processes and the  
14 organisms that are involved in nutrient removal are still poorly understood [19, 55]. Therefore, determining the taxonomic composition of  
15 the core microbiome and the expressed metabolic functions are important in optimizing purification processes and developing better  
16 purification strategies.

17 Large-scale genome sequencing efforts on activated sludge established the wastewater microbiome specific database called 'MiDAS'  
18 (Microbial Database for Activated Sludge). The consortium uniformly applies full-length 16S rRNA gene sequencing to create a worldwide  
19 map of microbes present in activated sludge systems, with the aim to link organisms to nutrient-removal functions [38-40]. Information  
20 obtained from DNA and rRNA-based approaches, however, have been often found to contradict staining experiments or measured  
21 metabolic conversions [16, 56, 57]. This underlines the importance of employing additional (orthogonal) approaches – such as  
22 metaproteomics – when characterizing complex communities. Nevertheless, the lack of standardization within the 'omics' field makes a  
23 comparison of different experiments highly challenging. This was observed even for studies that were performed with the same types of  
24 omics approaches [58, 59].

25 For example, metagenomics experiments are commonly employed to construct protein sequence databases for metaproteomics studies  
26 in order to enable a deep sequence coverage and a high taxonomic and functional resolution. A comprehensive taxonomic classification  
27 of the metagenomic data, however, relies on accurate and complete reference sequence databases. Consequently, a potential large  
28 source of variation and inaccuracy derives already from the reference databases that have been used to taxonomically classify the  
29 metagenomic sequences. Different reference databases substantially vary in taxonomic coverage, sequence content and the  
30 nomenclature and employed phylogenies. Modern phylogenetic placement tools employ a range of methods such as 16S similarity,  
31 average amino acid identity and average nucleotide identity [60, 61]. The NCBI taxonomy, that is used for RefSeq and UniProtKB employs  
32 a mixture of historical taxonomies and modern placement methods and lacks a rank normalization that ultimately results in lineages with  
33 gaps in taxonomic annotations (further referred to as 'gapped lineages') [62, 63]. In addition NCBI taxonomies contain taxa that cluster  
34 groups of uncultured organisms (further referred to as 'dump taxa') [64]. Thus, the NCBI taxonomy is often not consistent with respect to  
35 true evolutionary relationships. Many taxa circumscribe polyphyletic groupings and there is an uneven application of ranks across the  
36 phylogenetic tree [65-67].

37 Standardized reference sequence databases with accurate taxonomies are therefore of utmost importance to accurately describe  
38 microbial diversity, enable data comparison between experiments and approaches, and communicate scientific data [65, 68]. The  
39 recently-established genome taxonomy database (GTDB) addresses these issues by using a set of conserved proteins and employing a  
40 placement method that normalizes taxonomic ranks based on relative evolutionary divergence [65, 69-71]. The GTDB taxonomy offers  
41 an objective, phylogenetically-consistent classification of prokaryotic species, and therefore enables a more accurate description of the  
42 taxonomic and metabolic diversity of a microbial community [65].

43 The Genome Taxonomy Database Toolkit (GTDB-Tk) supports the classification of draft bacterial and archaeal genomes [70]. However,  
44 this tool was developed for genome assemblies or metagenome-assembled genomes that are constructed by clustering related contigs  
45 into bins [72, 73]. The binning procedure, however, leaves for complex metagenomes usually a substantial fraction of unbinned sequences  
46 [59]. Consequently, assembled genomes often provide a substantially less complete sequence reference database compared to the  
47 alternative reads- or contig-based databases [74-78], which is a major drawback for metaproteomic studies. For that reason, database  
48 construction and taxonomic classification has been frequently performed on contigs or scaffolds, e.g. as demonstrated by the contig  
49 annotation tool (CAT) only recently [79].

50  
51 In this study, we describe a deep metaproteomic characterization of the aerobic granular sludge microbiome obtained from different  
52 wastewater treatment plants, and systematically compare the observed taxonomic and metabolic profiles to the orthogonal DNA and

rRNA-based approaches. Moreover, we demonstrate the application of a 'homogenized' genome taxonomy database and showcase the impact of divergent reference database content on the outcomes. Ultimately, this comparative omics study underscores the importance of orthogonal metaproteomics experiments when characterizing complex microbiomes.

## MATERIALS AND METHODS

**Sampling of aerobic granular sludge.** Aerobic granular sludge (AGS) was collected from three different full-scale AGS wastewater treatment plants in the Netherlands: Dinxperlo (DX, plant 1), Garmerwolde (GW, plant 2) and Simpelveld (SP, plant 3). Each plant performed stable operation with simultaneous denitrification and phosphorous removal. AGS granules were sieved to select a size fraction with a diameter of approximately 2.0 mm. Granules were stored at -80°C until further processed. **Protein extraction and proteolytic digestion.** The collected granules were freeze-dried and ground with a mortar and pestle. Two hundred milligrams of acid washed glass beads (150–212 µm) and 350 µL of both TEAB and B-PER buffer were added to approximately 5 mg starting material. Bead beating was performed for 20 s (×3) with a 30 s pause between cycles. Samples were centrifuged and freeze/thaw cycles (×3) were performed by freezing the sample at -80°C and subsequently thawing at 95°C in a water bath. The samples were centrifuged, and the supernatant was collected. Protein precipitation was performed by adding TCA at a ratio of TCA to supernatant of 1:4. The samples were incubated at 4°C for 10 min. and then centrifuged at 14,000 r.p.m. for 5 min. The pellets were washed with 200 µL ice-cold acetone. The protein pellets were reconstituted in 250 µL 6 M urea and the protein extracts were then reduced with 10 mM dithiothreitol (DTT) for 60 min. at 37°C. Next, the samples were alkylated with 20 mM iodoacetamide (IAA) and incubated in the dark at room temperature for 30 min. Thereafter, the samples were diluted with 200 mM ammonium bicarbonate (AmBiC) to <1 M urea. Finally, sequencing-grade trypsin was added (Promega) at an approximate enzyme to protein ratio of 1:50 and incubated at 37°C overnight. The obtained peptides were purified by solid-phase extraction using Oasis HLB solid-phase extraction well plates (Waters) according to the protocol provided by the manufacturer. Purified peptide fractions were then dried in a SpeedVac concentrator, reconstituted in aqueous 0.1% TFA and separated (according to the instructions supplied by the manufacturer) into 8 fractions using the Pierce high pH reversed-phase fractionation kit (Thermo Scientific). For plants 2 (DX) and 3 (GW) the fractions 2+6, 3+7, 4+8 were combined. The obtained samples were dried in a SpeedVac concentrator and dissolved in water containing 3% acetonitrile and 0.1% formic acid, resulting in 8 fractions for plant 1 (DX), 4 fractions for plant 2 (GW) and 3 (SP). The approximate concentration of the protein digest was determined using a NanoDrop micro-volume spectrophotometer. **Shotgun metaproteomic analysis.** Briefly, the prepared fractions were analyzed by injecting approx. 300 ng proteolytic digest using a one-dimensional shotgun proteomic approach on a nano-liquid-chromatography system consisting of an EASY nano-LC 1200 equipped with an Acclaim PepMap RSLC RP C18 separation column (50 µm × 150 mm, 2 µm and 100 Å) coupled to a QE Plus Orbitrap mass spectrometer (Thermo Scientific, Germany). The flow rate was maintained at 350 nL/min using as solvent A water containing 0.1% formic acid, and as solvent B 80% acetonitrile in water and 0.1% formic acid. The Orbitrap was operated in data-dependent acquisition mode acquiring peptide signals at 70 K resolution and a max IT of 100 ms, where the top 10 precursor ions were isolated by a 2.0 *m/z* window with an 0.1 *m/z* isolation offset, and fragmented at an NCE of 28. The AGC target was set to 2e5 at a max. IT of 75 ms and 17.5 K resolution. Mass peaks with unassigned charge state, singly, 7 and >7, were excluded from fragmentation. For the prepared fractions from plants 2 (GW) and 3 (SP) analysis in duplicates was performed using a linear gradient from 5% to 28% solvent B for 115 min and finally to 55% B for additional 60 min. The individual fractions obtained from plant 1 were analysed by single injections using a short linear gradient from 6% to 26% solvent B for 45 min and finally to 50% B over additional 10 min. **Processing of metaproteomic raw data.** Mass spectrometric raw data (obtained from the fractions of each plant) were combined and analysed using PEAKS StudioX by either database searching against the metagenomic-constructed databases from predicted ORFs, or by *de novo* sequencing as quality control and to estimate the percentage of eukaryotic sequences [39, 80]. Redundant sequences in the constructed databases were removed by employing a local installation of CD-HIT [81]. Database search was performed by including cRAP protein sequences (<https://www.thegpm.org/crap/>), setting carbamidomethylation (C) as fixed and oxidation (M) and deamidation (N/Q) as variable modifications, allowing up to 2 missed cleavages and 2 variable modifications per peptide. Peptide-spectrum matches were filtered against 1% false discovery rate and protein identifications with ≥2 unique peptides were considered as significant. Taxonomic annotation of database-matched peptide sequences was achieved by determining the lowest common ancestor (LCA) using the taxonomic classification obtained for the contigs (see below for taxonomic classification of metagenomics data). Metabolic annotation with KEGG orthologies was performed using BlastKOALA [82]. Moreover, WEBMGA [83] was used to annotate Clusters of Orthologous Groups (COGs) and protein families (PFAMs and the complementary TIGRFAM terms). DIAMOND v2.11 [84] was used to annotate ORFs with UniprotKB genes. **DNA extraction and sequencing.** Extraction of DNA for both 16S rRNA gene sequencing and shotgun metagenomics was performed using a DNeasy UltraClean Microbial Kit (Qiagen, Germany), and the extracted DNA was quantitated with a Qubit fluorometer. 16S rRNA gene amplification was performed by Novogene (Novogene Co., Ltd., China) by amplifying V3–V4 regions with 341F, 806R primers. Sequencing of 16S rRNA genes and shotgun metagenomics was achieved with paired-end reads on an Illumina NovaSeq platform. **Processing of 16S rRNA raw sequencing data.** Standard read preparation including demultiplexing, trimming and

1 assembly was performed by Novogene (Novogene Co., Ltd., China). Cleaned reads were used to select amplicon sequence variants  
2 (ASVs) with Usearchv11 command -unoise3 [85]. To improve ASV selection, the data set was padded with additional sample sets  
3 containing different granule size fractions from each water treatment plant: flocs, >0.2, >0.7, >1.0 mm (data not shown). Taxonomic  
4 annotation was performed using QIIME2 [86] with trained V3–V4 classifiers. As a comparison, 16S rRNA sequences were annotated with  
5 GTDB representative of small subunit ribosomal RNA (ssu rRNA) sequences, Midas 3.7 flASVs, and a SILVA NR99 v138 pre-trained  
6 V3–V4 classifier [87]. To compare the effects of database homogenization, GTDB r202 complete 16S (ssu all) and representative (ssu  
7 reps) were analyzed with all sequences and full-length sequences of >1200 base pairs. **Processing of metagenomic raw sequencing**  
8 **data.** Reads were assembled for all samples using metaSPAdes v3.14.0 at default settings [88]. Prodigal v2.6.3 was employed as a gene  
9 caller to identify open reading frames (ORFs) [89]. DIAMOND v2.11 was used to align ORFs with parameters -fast -top 10 -e 0.001 (with  
10 otherwise default parameters) to protein databases of GTDB r202, from Uniprot release 2021 03: UniProtKB, Swiss-Prot UniRef100,  
11 UniRef90, UniRef50, and from NCBI RefSeq protein and RefSeq protein non-redundant release 205 [84]. The contig-level taxonomic  
12 classification was furthermore performed based on the 'CAT' approach published by Meijenfildt et al., 2019 [79]. Firstly, the taxonomy of  
13 each ORF was determined by lowest ancestor analysis of the top Diamond hits followed by constructing a consensus lineage for each  
14 contig from the annotated ORFs. Adjustments compared to the original CAT approach were performed with the objective to maximize  
15 genus level annotations. Details about the adjusted approach is can be found in the supplementary information material and Figures S1–  
16 2. Preprocessing of sequences obtained from the genome taxonomy database (GTDB) for the use with Diamond as well as the 'protein  
17 LCA' of the diamond alignments were performed with the python tools available via <https://github.com/hbckleikamp/GTDB2DIAMOND>.  
18 Reformatting of the sequences for the use with QIIME were performed with the python tools available via: [https://github.com/hbckleikamp/](https://github.com/hbckleikamp/GTDB2QIIME)  
19 [GTDB2QIIME](https://github.com/hbckleikamp/GTDB2QIIME). The metagenome coverages were as estimated by Bowtie 2 v2.3.5.1 and QualiMap 2 v2.2.2 [90, 91] where the reads  
20 were first mapped to individual scaffolds using Bowtie and the obtained BAM file were analysed using QualiMap. The average depth of  
21 sequencing coverage was determined according to LN/G (L= length of read, N = number of reads and G = genome length) [92], which  
22 values were furthermore summed for every taxonomic identifier for compositional analysis as shown in the bar graphs. **Homogenization**  
23 **of GTDB.** The 'homogenized' GTDB protein reference sequence database was constructed from organisms that are also represented in  
24 the 'GTDB ssu reps' (small-subunit ribosomal RNA database) and that contained 'full length' 16S rRNA sequences (the cutoff to define  
25 'full length' sequences was set to >1200 base pairs). **Comparative analysis of taxonomic classifications and annotation coverage**  
26 **obtained by employing different databases.** The annotation differences obtained from using the different reference sequence  
27 databases was visualized with Sankey flow diagrams. The nomenclature differences between GTDB and the other databases such as  
28 NCBI, UniprotKB, SILVA or MIDAS however challenges a comprehensive comparison. Therefore, taxonomic nomenclatures were 'unified'  
29 using auxiliary conversion tables obtained from [https://data.gtdb.ecogenomic.org /releases/latest/](https://data.gtdb.ecogenomic.org/releases/latest/). If taxonomic names matched at least  
30 3 out of 4 times, the name was changed to the respective name reported in GTDB. Furthermore, 'Candidatus' prefixes and GTDB unique  
31 suffixes such as 'Firmicutes\_A', 'Firmicutes\_B', were removed. Gaps in the taxonomic lineage annotations were 'bridged'. The  
32 representation of the taxonomic abundance in the graphs is based on total ASV counts for 16S amplicon sequencing data, (summed)  
33 depth of sequencing coverage of related contigs for metagenomics data, and total number of peptide-to-spectrum matches (PSMs) for  
34 metaproteomics data. The employed conversion tables (NCBI and SILVA to GTDB, and vice versa) can be found in the supplementary  
35 information (SI-Excel-1–3). **Shared biomass fraction, diversity, richness and evenness.** The shared biomass (or genera) was  
36 determined between taxonomies that were observed by at least two techniques (=non-unique taxa), and which taxa further were present  
37 at >3% abundance (compared to total abundance of the non-unique taxa within one technique). Taxa which express central nutrient-  
38 removing genes were included into the evaluation regardless their abundance. Diversity, richness, evenness and shared biomass were  
39 determined after uniformly applying an abundance cut-off of 0.1% in order to homogenize data treatment across the three techniques.  
40 Richness corresponds to the number of unique taxa. Simpson's evenness and Shannon's diversity were calculated using the Python  
41 functions 'skbio.diversity.alpha.simpson\_e(X)' and 'skbio.diversity.alpha\_diversity("shannon",X)' which are part of the skbio Python  
42 package (<http://scikit-bio.org>). Determination of the abundance of taxa was based on total ASV counts for 16S amplicon, summed depth  
43 of contigs in metagenomics, and the total number of peptide-to-spectrum matches for metaproteomics. **Functional classification,**  
44 **between technique abundance differences and COG term enrichment analysis.** The total abundance was renormalized to a subset  
45 of non-unique taxa that showed an abundance of >3%, or that contained nutrient-removal genes. The between technique absolute  
46 abundance difference ( $x - y$ ) and percent abundance difference  $(x - y) / (((x + y)) / 2)$  was then determined for every genus. The functional  
47 analysis and classification was performed by integrating KEGG, COG, PFAM, TIGRFAM and UniprotKB genes (for NXR). Two manually-  
48 curated sub-classifications were added to the COG system; 'nitrogen metabolism' (based on KEGG pathways) and 'porin' that includes  
49 beta-barrel proteins. Between method COG term enrichment was determined by comparing PSMs from metaproteomic experiments to  
50 read counts ('summed sequencing depth') from metagenomics experiments. **Raw data availability:** The mass spectrometry proteomics  
51 raw data have been deposited in the ProteomeXchange consortium database with the dataset identifier PXD030677. Raw sequencing

data have been made available through the NCBI Sequence Read Archive (SRA) under accession number: SRP352708. The BioProject accession number is PRJNA792132.

## RESULTS

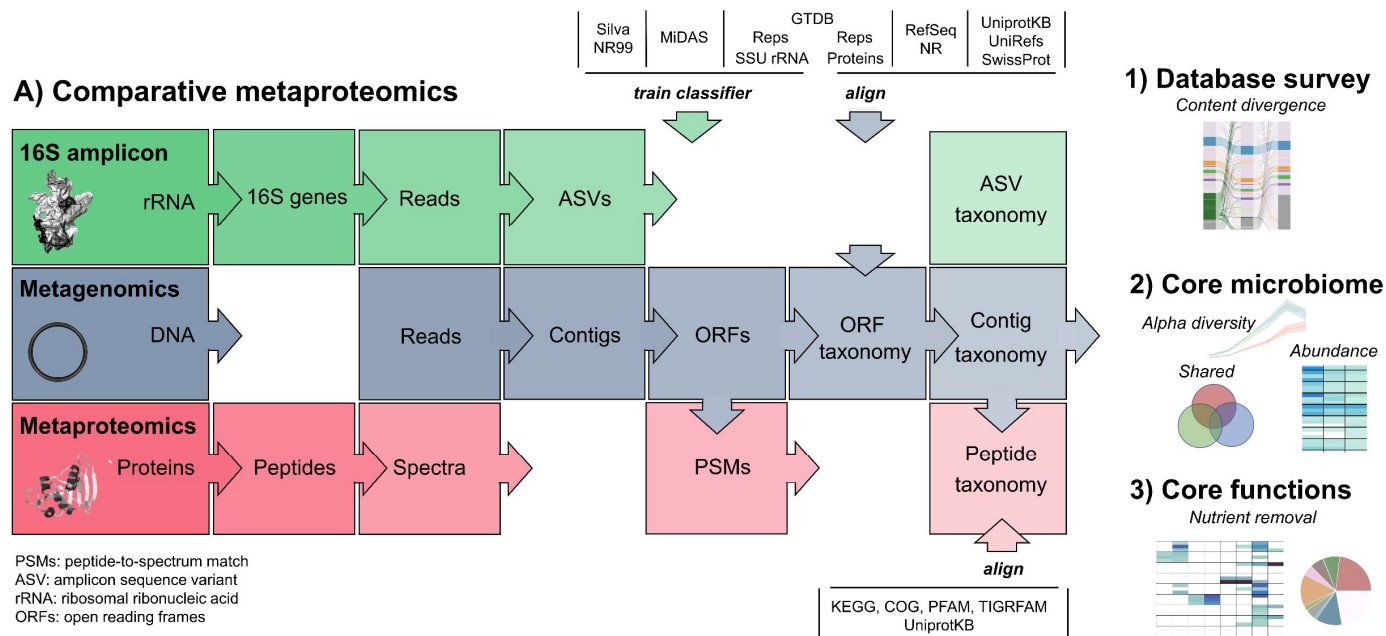

## B) GTDB contig classification

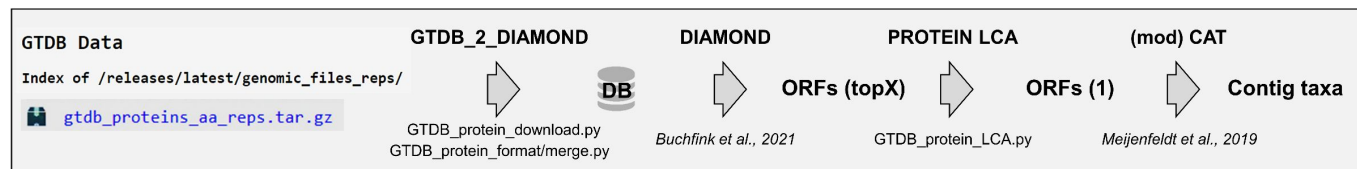

**Figure 1: A)** The graph shows a workflow diagram of ‘omics’ techniques and reference sequence databases used to perform a deep, comparative metaproteomics study on the complex microbiome of aerobic granular sludge. In addition to metaproteomics (red), the same microbiomes were analysed via orthogonal metagenomics (blue), and 16S rRNA amplicon sequencing (green). For 16S rRNA gene sequencing the V3–V4 region was amplified. Furthermore, the amplicon sequencing variants (ASVs) were determined and compared to small subunit ribosomal RNA (SSU rRNA) sequence databases for taxonomic classification (ASV taxonomy). For whole metagenome sequencing (metagenomics) reads were assembled into contigs. Identified ORFs were furthermore aligned to reference sequence databases for taxonomic classification (ORF taxonomy) to ultimately provide a taxonomic classification for the contigs (contig taxonomy). Metaproteomics was performed by analyzing the tryptic peptides using a shotgun proteomics approach. Peptide spectra were subsequently analysed using the protein sequences (ORFs) identified from the metagenomics experiments. Taxonomic classification was aligned to the taxonomies determined for the respective contigs. In addition to the different omics approaches, a range of different reference sequence databases were used for taxonomic classification. The obtained outcomes were finally evaluated for the 1) impact of reference sequence content divergence on obtained taxonomic profiles, 2) core microbiome that was consistently observed by all approaches, as well as the shared microbiome between the different treatment plants, and finally for the 3) expressed key functions as determined by metaproteomics. **B)** The scheme outlines the taxonomic classification of contigs using different reference sequence databases, as exemplified for the genome taxonomy database (GTDB). Reference sequences (protein reps) were downloaded from GTDB (<https://gtdb.ecogenomic.org/downloads/>), merged into a single file and reformatted to allow the use with the sequence aligner Diamond [84]. A consensus lineage was furthermore determined using a lowest common ancestor (LCA) algorithm, and finally, a contig-level lineage (taxonomy) was determined using a modified version of the CAT tool algorithm (details concerning the modified CAT algorithm are detailed in the SI-doc, chapter 1) [79]. The taxonomies assigned to individual contigs were subsequently used to classify the peptide-to-spectrum matches (PSMs) obtained by metaproteomics. The established python codes are openly accessible via Github (see methods section). To support comparison between the different approaches, a homogenized Genome Taxonomy Database (GTDB) was constructed from organisms represented in GTDB ssu reps and from organisms that contained complete 16S rRNA sequences (see methods section).

## **A deep comparative metaproteomic study on the core microbiome of granular sludge**

Here, we demonstrate a deep comparative metaproteomic study by simultaneously applying metaproteomics, metagenomics and 16S rRNA sequencing to the same granular sludge microbiome (with uniform 2 mm granule size). In addition to the different approaches, we systematically investigated the impact of employing different reference sequence databases on the obtained taxonomic profiles and metabolic functions (Figure 1). A uniform database with an accurate taxonomy is of greatest importance in order to improve comparability between different 'omics' approaches and to accurately capture the microbial diversity [65, 68]. The genome taxonomy database (GTDB) uses a set of conserved proteins to normalize taxonomic ranks based on relative evolutionary divergence with the aim to provide an objective, phylogenetically consistent classification of prokaryotes [65, 69-71]. The Genome Taxonomy Database Toolkit (GTDB-Tk) furthermore enables to efficiently classify bacterial and archaeal draft genome assemblies [70, 72, 73]. However, in metagenomics, the clustering and binning of contigs into individual genomes commonly results in a substantial number of unbinned fractions [77, 78]. This can significantly bias the taxonomic representation towards the more abundant organisms in a community.

Therefore, in order to construct a more comprehensive sequence database we performed the taxonomic classification at the contig-level. For this, we developed Python codes that enable to use protein sequences obtained from GTDB with DIAMOND and QIIME, to perform protein sequence alignment and classification of amplicon sequence variants, respectively (see methods section for Github repository of Python codes). A consensus lineage for each contig was determined using a modified version of the contig annotation tool (CAT) [79]. The stringency of the original CAT algorithm may result in a lower number of genus-level annotations. The algorithm and the parameters were therefore adjusted to improve genus level annotations, while adhering to taxonomies originally observed in the 16S amplicon sequencing experiments (SI-doc chapter 1, Figures S1-2). Moreover, to better standardize the taxonomic classification between metaproteomics, metagenomics and 16S amplicon sequencing, we established a 'homogenized' version of GTDB (SI-doc chapter 2). Advantageously, GTDB can be also employed to classify the 16S rRNA amplicon sequencing data because it contains small subunit ribosomal RNA sequences (ssu rRNA). However, approximately 15% of the representative taxa in GTDB contain 16S sequences that are shorter than 1200 base pairs and approximately 30% completely lack corresponding 16S sequences (SI-doc, chapter 2, Figure S3-5). GTDB was therefore homogenized by selecting only taxa that are also represented with (full length) 16S rRNA sequences. Albeit this decreased the number of organisms in the constructed database, the comparative classification with the non-homogenized database showed only an overall decrease of approx. 5% of reads/PSMs matches (SI-doc Figures S6-8). Nevertheless, the homogenized database ensured a comparable reference sequence content and a therefore more accurate comparison between the approaches. Noteworthy, because the 16S-based classification follows a different principle it may therefore never be fully comparable to the contig-based classification (e.g., Bayesian classifiers versus read assembly and sequence alignment).

## A) Taxonomic profiles of granular sludge across different databases and approaches

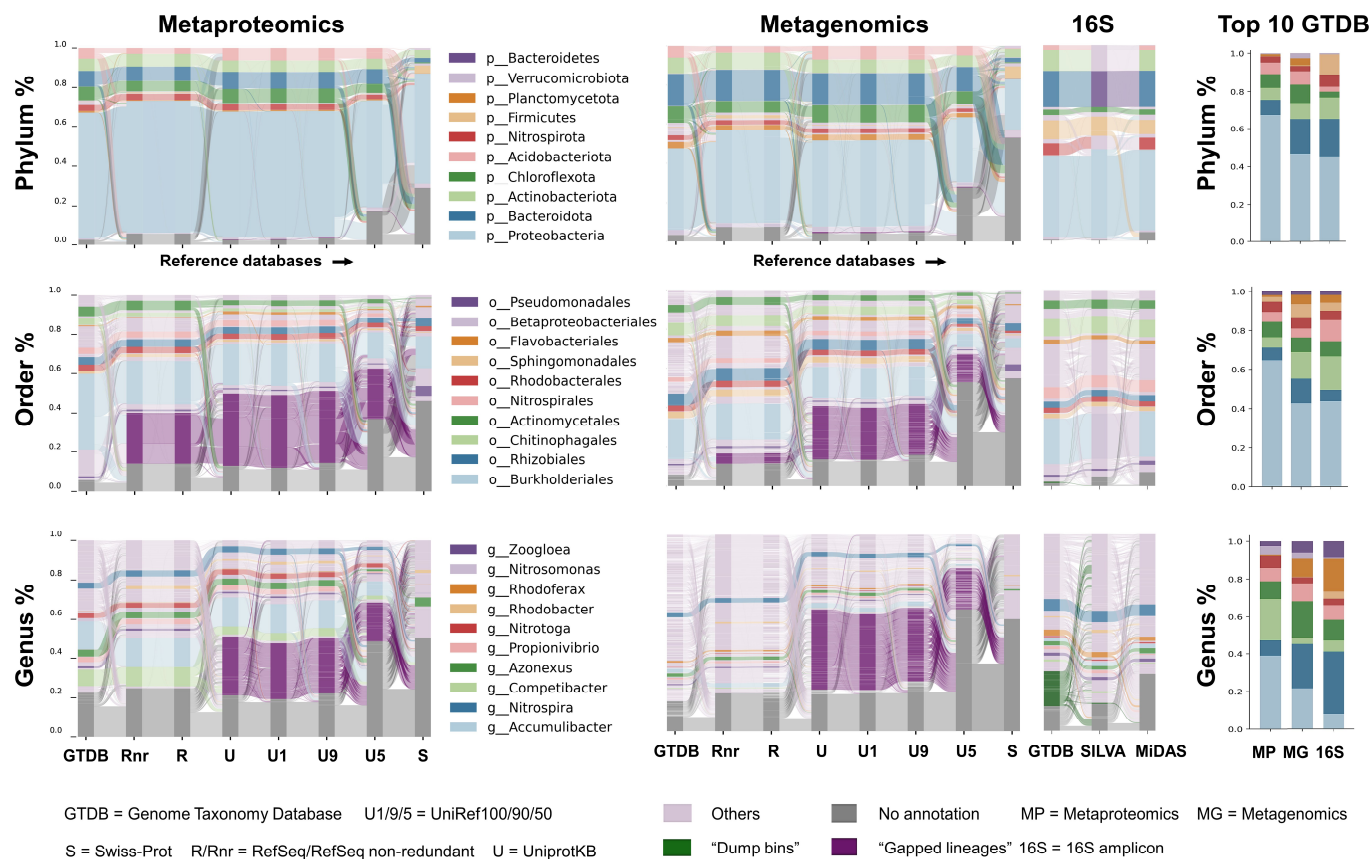

## B) Genus fraction variation across different databases of top 10 taxonomies

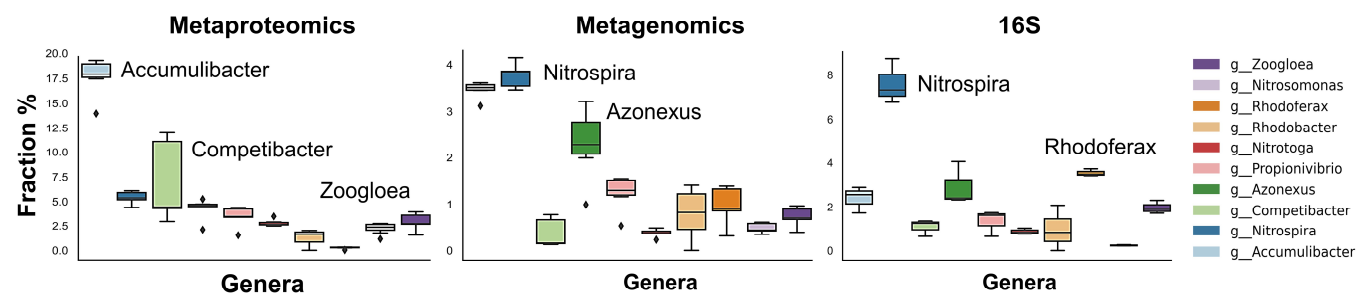

**Figure 2: A)** The Sankey flow diagrams show the impact of different reference sequence databases on the obtained taxonomic profiles for the granular sludge microbiome when using i) metaproteomics, ii) metagenomics, and iii) 16S amplicon sequencing (from the left to right). The applied reference sequence databases for classifying the metaproteomics and metagenomics data were GTDB, RefSeq non-redundant, RefSeq, UniprotKB, UniRef100, UniRef90, UniRef50 and SwissProt. The 16S amplicon sequencing data were classified using the ribosomal RNA reference sequence databases GTDB ssu reps, MiDAS and SILVA. The 10 most abundant taxa identified by the different approaches are furthermore presented as separate bar graphs on the right. Regardless the overall differences, the top taxonomies provide comparable profiles between the different approaches. GTDB represents a homogenized version of the Genome Taxonomy Database (GTDB) that contains only taxonomies with full length 16S reps. Taxonomic names were

1 'unified' as described in the methods section. Sankey flow diagrams that demonstrate the minor impact of the database homogenization on the overall  
2 microbiome coverage are shown in Figures S6–8. The Sankey flow diagrams and bar graphs were constructed by combining the annotations obtained  
3 from all aerobic granular sludge microbiomes (from plants 1–3). Extended Sankey flow diagrams for metaproteomics detailing all main taxonomic ranks  
4 are shown in Figure S9. **B)** The box plots show the genus fraction variation of the top 10 taxonomies for metaproteomics, metagenomics and 16S amplicon  
5 sequencing (from left to right) across the different reference sequence databases (excluding Swiss-Prot). *Competibacter* showed a considerably large  
6 variation in metaproteomics, where *Ca. Competibacter*, *Azonexus*, *Rhodobacter* and *Rhodoferax* on the other hand showed large genus fraction variations  
7 in metagenomics. The taxonomic abundances shown in the figures was determined by summing the total number of peptide-to-spectrum matches for  
8 metaproteomics, the 'summed average depths of sequencing' for metagenomics, and by using the total ASV counts for 16S rRNA amplicon sequencing.  
9

### 10 **The impact of reference sequence database content divergences on obtained taxonomic profiles**

11 The taxonomic classification of the metaproteomics and DNA and rRNA-based outputs was performed with a range of different reference  
12 sequence databases. The evaluation included protein sequence databases derived from UniProt (UniprotKB, UniRef, Swiss-Prot), NCBI  
13 (RefSeq) and ribosomal RNA reference sequence databases MIDAS and SILVA. Furthermore, we constructed a homogenized version  
14 of the recently-established genome taxonomy database (GTDB), which could be uniformly employed across the different approaches.  
15 The individual taxonomic profiles for the metaproteomics and the metagenomic data were visualized by Sankey diagrams to i) visualize  
16 the degree of annotation, the ii) flow in sequence annotations between databases, and to iii) evaluate the data for discrepancies within  
17 (or between) the different approaches (Figure 2). The graphs demonstrate highly-comparable phylum level profiles obtained after  
18 employing different reference sequence databases. At the lower taxonomic ranks, however, the application of different reference  
19 sequence databases led to substantial discrepancies in the obtained taxonomic profiles. For example, the UniprotKB and NCBI-derived  
20 RefSeq sequences that use the NCBI taxonomy showed a large number of (primarily) prokaryotic lineages that contain generic  
21 placeholder names and gaps characterized by keywords such as: 'uncultured', 'unidentified', 'organism', 'metagenome', 'unknown',  
22 'subgroup', 'group', 'bacterium' or 'proteobacterium' (these are further referred to as 'dump taxa' in this study). For example, *Ca.*  
23 *Accumulibacter* is a prominent and key phosphate-accumulating organism in wastewater microbiomes. In GTDB, the lineage is:  
24 k\_\_Bacteria, p\_\_Proteobacteria, c\_\_Gammaproteobacteria, o\_\_Burkholderiales, f\_\_Rhodocyclaceae, g\_\_Accumulibacter. However, in  
25 NCBI taxonomy, *Ca. Accumulibacter* is stranded at the order and family level because of 'uncertain placement' where it only shows the  
26 gap annotation: 'Betaproteobacteria incertae sedis'. Such inconsistencies strongly bias the taxonomic profiles and emphasizes the  
27 importance of rank normalization used in the genome taxonomy database. Moreover, as expected, increasing levels of sequence  
28 clustering reduces taxonomic resolution. Therefore, the highest degree of clustering resulted in a significant proportion of unnamed  
29 sequences. Likewise, the manually-annotated SwissProt database from UniProt Knowledgebase has a limited taxonomic coverage  
30 (approx. 300 K bacterial protein sequences, release 2021\_03 statistics, <https://web.expasy.org/docs/reNotes/reStat.html>) and showed  
31 the lowest number of sequence annotations. Most importantly, for every metaproteomic experiment, a fraction of sequences remained  
32 that did not obtain any taxonomic classification, and which fraction could not be further interpreted. For GTDB, the fraction of sequences  
33 without annotations ranged from <5% at the phylum level, to approximately 25% at the genus level (this fraction is often also not shown  
34 in result graphs). In more extreme cases, e.g., the highly-clustered UniRef sequence database, the fraction without genus-level annotation  
35 contributed to >50% of the total sequences. Overall, and as was expected, the Sankey graphs for the metaproteomic and metagenomic  
36 data followed very similar trends. The metagenomic data sets, however, showed a significantly greater diversity. This was also apparent  
37 in the 'top 10 genera bar graphs'. For metagenomics, this fraction accounted for only around 5% of the total volume, compared to more  
38 than 33% for metaproteomics.

39 Additionally, the GTDB-annotated 16S amplicon sequencing data were compared to the annotations obtained from SILVA NR99 and the  
40 wastewater-specific MIDAS databases (which both are based on the SILVA taxonomy framework). Thereby, a notable discrepancies  
41 were observed, e.g. for the genus *Tetrasphaera*, which is a key phosphate-accumulating organism (PAO) in wastewater treatment plants  
42 [19, 93]. When using the MIDAS and SILVA reference databases this genus appeared to be very abundant. *Tetrasphaera* was also  
43 observed when using the UniRef reference sequence database (albeit very low abundant), but it was nearly absent when using GTDB  
44 as reference sequence database. Interestingly, the same sequences were however found annotated with 'c\_\_Actinomycetia'. A closer  
45 inspection of GTDB sequences by BLAST+ confirmed that although *Tetrasphaera japonica* was matched to each of the respective ASVs,  
46 it did not obtain the highest percentage identity for the 16S sequencing data. The best match however was a genus of the  
47 *Dermatophilaceae* family (SI-doc, Figure S10, and SI-EXCEL-4). This observation appears to be a limitation of the V3–V4 primer  
48 resolution and from a difference in phylogenetic placement because GTDB reassigns many taxa that are annotated as *Tetrasphaera* in  
49 NCBI to different genera. Complete tables with abundances as obtained for the individual databases can be found in the supplementary  
50 information (SI-EXCEL-5-7). Interactive Krona charts for the aerobic granular sludge microbiomes from the different wastewater treatment  
51 plants (1–3) across all approaches (classified by GTDB) are available via GitHub page  
52 [https://pabstm.github.io/Comparative\\_metaproteomics\\_kronas/](https://pabstm.github.io/Comparative_metaproteomics_kronas/) and the supplementary information as excel macro-enabled workbooks  
53 (SI-EXCEL-8-16).



### A) Shared taxonomies between approaches

Shared genus level taxonomies observed for granular sludge from different treatment plants and three different approaches: metaproteomics (MP), metagenomics (MG) and 16S amplicon sequencing (16S).

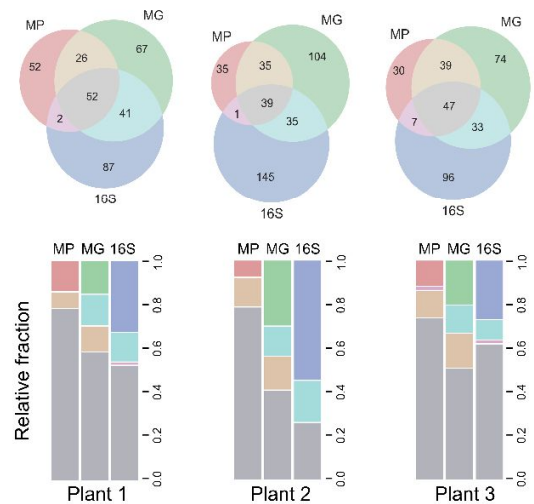

### B) Richness, evenness and diversity across different approaches

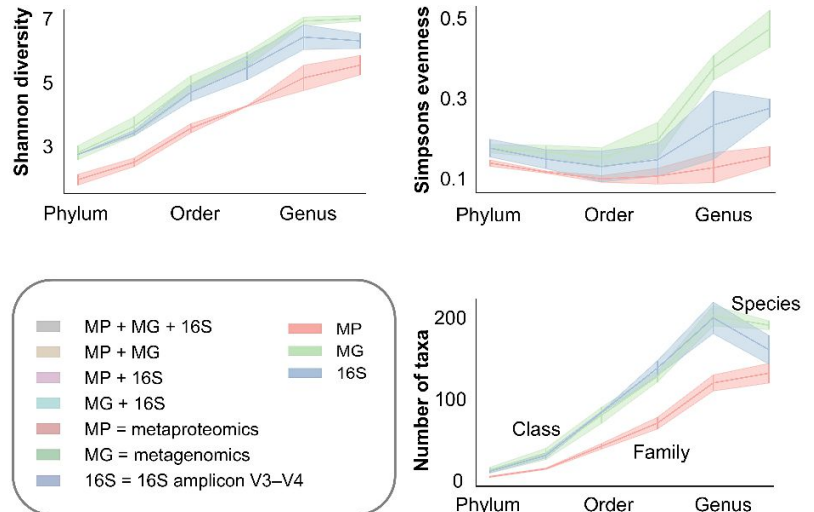

**Figure 3: A)** Shared genus-level taxonomies between metaproteomics and the DNA and rRNA-based approaches for the granular sludge microbiomes from the three wastewater treatment plants 1–3. Data is expressed as numbers of shared taxa (upper images, Venn diagrams) or as a fraction of total shared abundance fraction (lower images, bar graphs). The graphs consider only taxonomies that were observed by at least two techniques (non-unique taxa), and which taxa further were present at >3% abundance (compared to total abundance of non-unique taxa), or which express central nutrient-removing genes. Albeit the fraction of genera that were uniformly observed by all 3 approaches appears relatively moderate (grey sections, Venn diagrams), those taxonomies coverage the majority of the protein-biomass in metaproteomics (grey bars, bar graphs, labelled with 'MP'). The color codes are further described in the box. **B)** The graphs visualize the microbial diversity indices i) 'Richness', ii) 'Simpson's Evenness' and iii) 'Shannon diversity' for the granular sludge microbiomes as obtained from the different approaches. The graphs are displayed for the taxonomic ranks phylum, class, order, family, genus, and species. The data from the three plants (1–3) were averaged. Graphs in A and B were generated by using a homogenized Genome Taxonomy Database (GTDB) that contains only taxonomies with 'full length' 16S reps. As expected, the DNA and rRNA based approaches (green and blue traces) show a significantly larger number of genera, but suggest also a much higher taxonomic evenness, compared to metaproteomics (red traces).

### Shared microbiome and biomass fractions between metaproteomics, metagenomics and 16S amplicon sequencing

When comparing the taxonomic profiles obtained by metaproteomics with those obtained by genomic approaches we observed differences already at the phylum level (Figure 2A). Here, the dominant proteobacteria encompass a larger fraction in metaproteomic experiments compared to the genomic methods. These differences are even more apparent at the lower genus level (Figure 2A and 2B). For example, *Ca. Competibacter*, *Ca. Accumulibacter* and *Ca. Nitrotoga* are very prominent in the metaproteomic experiments; but are much less pronounced in the metagenomic and 16S amplicon sequencing data. On the other hand, *Nitrospira* appears (relatively) abundant when performing genomic experiments, and the 16S amplicon data moreover suggest a high abundance of *Tetrasphaera* and *Rhodospirax*.

Nevertheless, regardless of the differences in the overall taxonomic annotations, the relative proportions of the top 10 taxonomies between the different approaches (when using the 'homogenized' GTDB) were surprisingly comparable (Figure 2A, right bar graphs). Nonetheless, the total number of taxonomies (genera) that were observed by all three techniques appeared relatively moderate (Figure 3A, Venn diagrams: 52, 39 and 47 genera for plants 1–3, respectively). On the other hand, the 'total abundance fraction' which those shared genera covered was comparatively large (Figure 3A, grey bars, lower bar graphs). For example, the genera that were observed by all three approaches accounted in metaproteomics for approximately 80% of the total abundance. The abundance fraction the shared genera covered in 16S amplicon sequencing was however significantly lower (approx. 30–60%, depending on the treatment plant). Because metagenomics and 16S amplicon sequencing showed a large number of very low abundant taxonomies, for this evaluation only genera that were observed by at least two techniques and that were >3% of the total abundance were considered. Taxonomies that express central nutrient-removing genes were included regardless of their abundance.

Furthermore, both metagenomics and 16S amplicon sequencing generally showed a larger diversity, richness and evenness compared to metaproteomics (Figure 3B). 16S amplicon sequencing, for example, identified the largest number of taxonomies at the genus level (approx. 200). This was not unexpected, as the DNA and rRNA-based approaches utilize amplification steps and also measure free genetic material, dead and dormant microbial cells. On the other hand, albeit metaproteomics appears to have a lower sensitivity and therefore identified the lowest number of genera, the shared taxonomies (considering the above mentioned thresholds) accounted for a large fraction of the measured (protein-based) biomass.

### A) Genus-level abundances

Abundances of genera from aerobic granular sludge  
From wastewater plants 1–3 across different approaches.

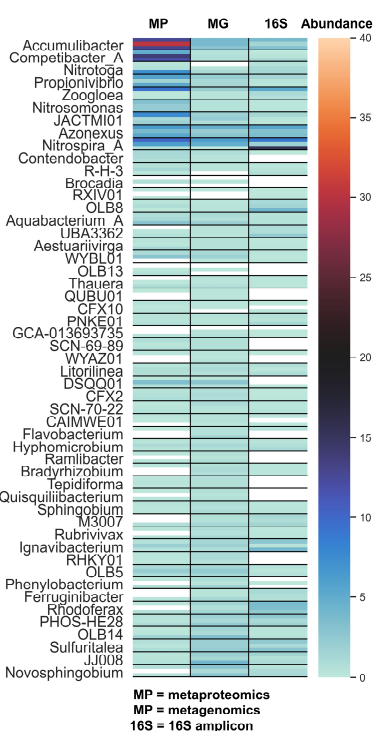

### B) Expression levels of key genes

Abundances of genes from selected nutrient-removal pathways determined by metaproteomics.

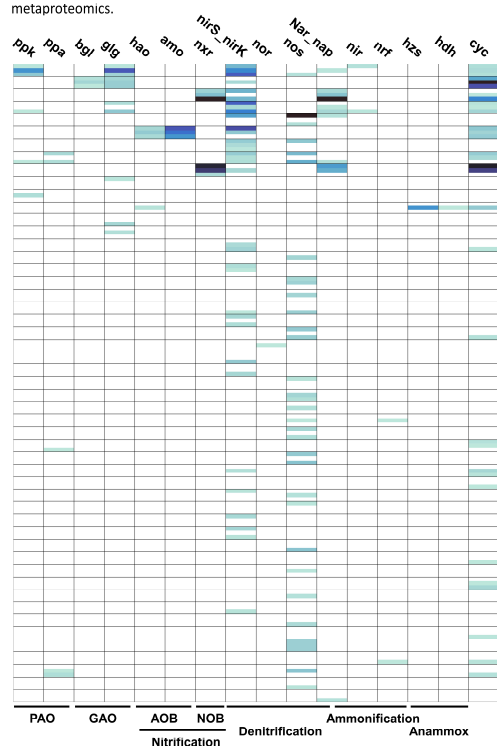

### C) Genus-level abundance differences

Differences in abundances of genera listed in A between metaproteomics and genomic based approaches, in absolute (left) or % changes.

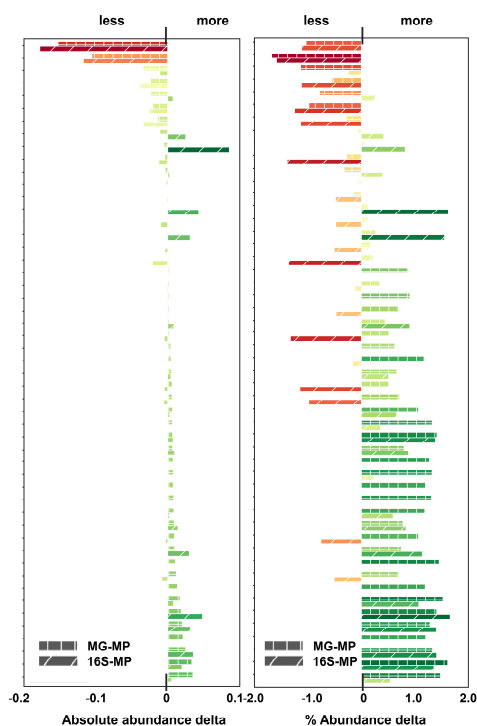

**Figure 4:** **A)** The heat map shows (key) genera that are present in the aerobic granular sludge microbiome, and which are potentially involved in the central nutrient-removal processes that take place during the wastewater treatment. The taxonomic abundances observed in metaproteomics (MP), metagenomics (MG) and 16S rRNA amplicon sequencing (16S) are shown in separate columns (from left to the right). The abundances observed in the microbiomes obtained from the different treatment plants are shown as individual bars within one cell (top bar = plant 1, middle bar = plant 2 and lower bar = plant 3). Generally, the most dominant genera observed in metaproteomics are *Ca. Accumulibacter* followed by *Ca. Competibacter*. In metagenomics, the most abundant genera are *Nitrospira*, *Ca. Accumulibacter* and *Azonexus*. Nevertheless, for the genomic approaches, taxonomies were generally found more evenly distributed. **B)** The heat map details expression levels of genes from selected nutrient-removal pathways as observed by metaproteomics. The genes are named on the top of the heat map (ppk = polyphosphate kinase, ppa = pyrophosphatase, bglX = beta-glucosidase-like, glg = glycogenin glucosyltransferase, hao = hydroxylamine oxidoreductase, amo = ammonia monooxygenase, nrx = nitrite oxidoreductase, nirK = copper-containing nitrite reductase, nirS = cytochrome cd1-containing nitrite reductase, nor = nitric oxide reductase, nos = nitric oxide synthase, nar = respiratory nitrate reductase, nap = periplasmic nitrate reductase, nir = nitrite reductase genes (converting nitrite to nitric oxide), nrf = nitrite reductase (which converts nitrite to ammonium), hzs = hydrazine synthase, hdh = hydrazine dehydrogenase and cys = cytochrome). The corresponding pathways or organisms are indicated below the heat map (PAO = phosphate accumulating organism, GAO = glycogen accumulating organism, AOB = ammonia-oxidizing bacteria, NOB = nitrite oxidizing bacteria) **C)** The graph shows the abundance differences for the selected genera between metaproteomics and metagenomics (bars with vertical pattern), or metaproteomics and 16S amplicon sequencing (bars with diagonal pattern). The differences are expressed as absolute differences (left plot) or as % abundance differences (right plot). Graphs were generated by using a homogenized Genome Taxonomy Database (GTDB) that contains only taxonomies that are also represented by 'full length' 16S reps.

## 1 **Observed key metabolic genes and metabolic traits**

2 Two key processes of nutrient removal in wastewater treatment are the elimination of nitrogen and phosphorous. To assess genera  
3 involved in the conversion of these two core processes we integrated the functional annotations obtained from KEGG, COG terms, PFAM,  
4 TIGRFAM domains and UniprotKB genes (Figure 4). Interestingly, the functional genes covering the nitrogen processes are currently  
5 fragmented across different databases. For example, *Nxr* annotation was annotated via UniprotKB, *Nap* by KEGG, and *Nar* using COG  
6 terms. Polyphosphate-accumulating organisms (PAO) remove phosphate from the wastewater by producing polyphosphate with the  
7 genes *ppk* (polyphosphate kinase) and *ppa* (pyrophosphatase). Glycogen-accumulating organisms (GAO) – that compete with PAOs for  
8 short-chain fatty acids – synthesize glycogen using *glg* (glycogenin glucosyltransferase) and likely therefore show also high expression  
9 of *bgIX* (beta-glucosidase like enzymes). Nitrogen removal is achieved via subsequent nitrification and denitrification steps that is  
10 performed by *hao* (hydroxylamine oxidoreductase) and *amo* (ammonia monooxygenase) genes of ammonia-oxidizing bacteria (AOB)  
11 and *nxr* (nitrite oxidoreductase) of nitrate-oxidizing bacteria (NOB). Denitrification (DN) is encoded by the gene clusters *nar* (respiratory  
12 nitrate reductase) and *nap* (periplasmic nitrate reductase) to reduce nitrate and *nirK* (copper-containing nitrite reductase) and *nirS*  
13 (cytochrome cd1-containing nitrite reductase) to reduce nitrite, while the genes *nor* (nitric oxide reductase), *nrf* (nitrite reductase) turnover  
14 nitric oxide, and ultimately, *nos* (nitric oxide synthase) converts nitrous oxide to dinitrogen gas. *Cyc* (cytochrome C) is implicated in either  
15 the activity of *nor* or *nrf*. Interestingly, *nor* proteins were only detected at low levels, which supposedly is a consequence of membrane  
16 association or of poor database annotation accuracy. Furthermore, *hzs* (hydrazine synthase), *hdh* (hydrazine dehydrogenase) as well as  
17 *hao* (hydroxylamine oxidoreductase) could be detected in one plant, which are part of the anammox process such as found in *Ca.*  
18 *Brocadia*. Interestingly, several of the key nutrient-removing genera appeared very low abundant in metagenomics and 16S amplicon  
19 sequencing data, which was in contrast to the metaproteomics outcomes. These include genera such as *Accumulibacter*, *Competibacter*  
20 and *Propionivibrio* (PAO, GAO and DN, respectively), *Nitrosomonas* (AOB) and *Nitrotoga* (NOB and DN), and *Zoogloea* (DN). Conversely,  
21 several other genera, such as *Azonexus* (PAO and DN) and *Nitrospira* (NOB and DN) showed only a minor difference between the  
22 orthogonal methods. In addition to *Sulfuritalea* (PAO and DN), other genera were even more prominent in the DNA and rRNA-based  
23 approaches. For *Ca. Accumulibacter*, this observation is in agreement with previous studies [57, 94, 95], but for *Ca. Competibacter*,  
24 however, the observed differences have not been reported before. Moreover, a recent large-scale genomic study showed the widespread  
25 presence of genes such as *nosZ* (nitrous-oxide reductase) or *ppk* (polyphosphate kinase), which were detected in a large fraction of the  
26 MAGs [96]. However, *ppk* for example, could be actually observed by metaproteomics in only a few genera at significant levels. The  
27 search terms (used in this study) to extract functional information from the metaproteomics data, as well as a complete table detailing  
28 protein taxonomic and functional annotations for all treatment plants can be found in the supplementary information (SI-EXCEL-17-18).

### A) Enriched COG categories

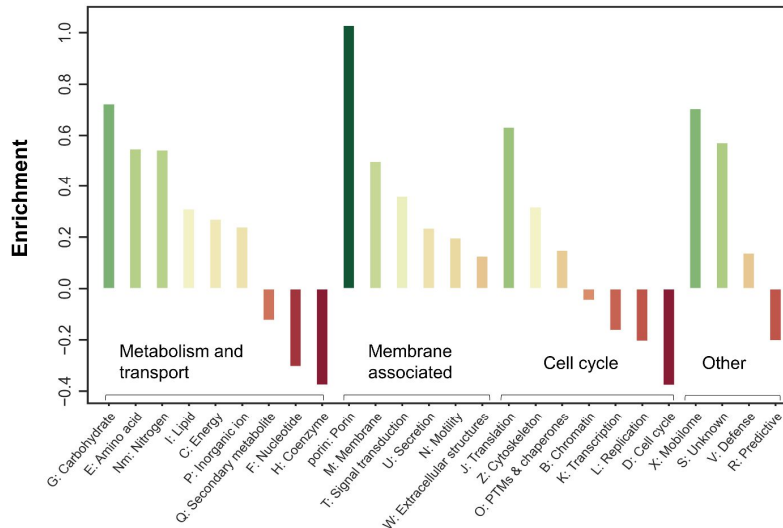

### B) COG category distribution

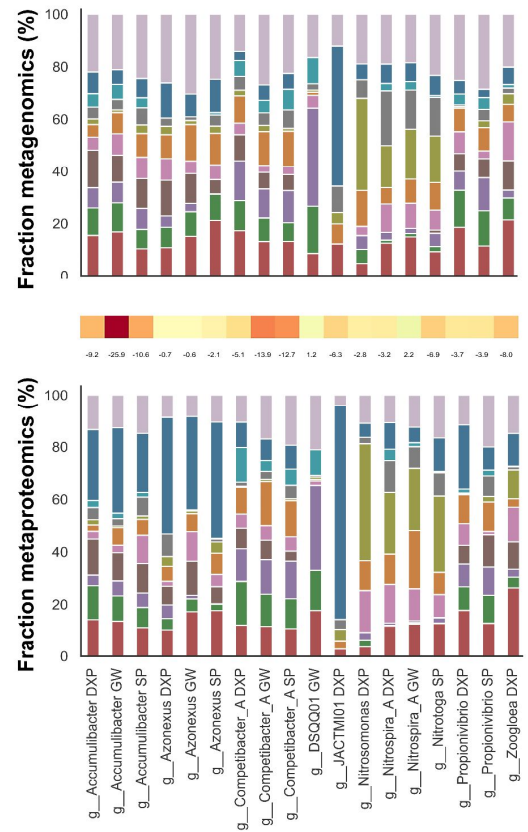

### C) COG distribution individual taxa

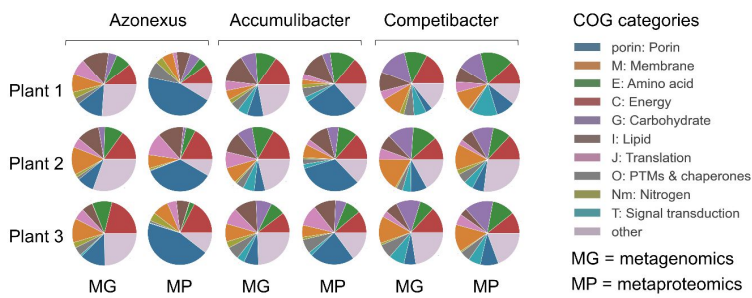

**Figure 5:** A) The bar graph shows COG term enrichment analysis (Clusters of Orthologous Groups) for the metaproteomics data of the combined (averaged) granular sludge microbiome data. B) The graph compares COG category distribution of abundant organisms between metagenomics (upper graph) and metaproteomics (lower graph). C) Comparison of proportion of COG categories for selected organisms between metaproteomics (MP) and metagenomics (MG). Metagenomics data are based on the summed depth of sequencing while metaproteomics data are based on peptide-to-spectrum matches (PSMs). The graphs show averaged data from the wastewater plants 1–3 (except otherwise stated).

### Categorization of the observed metaproteome

The COG classification system was used to further categorize the observed proteins and to group them into the categories ‘metabolism and transport’, ‘membrane-associated’, ‘cell cycle’, and ‘other’ (Figure 5, and a detailed table with annotated proteins can be found in SI-EXCEL-18). Approximately 80% of the peptide-to-spectrum matches could be grouped into any of the categories following the combined annotation using KEGG, PFAM and TIGRFAM. Comparing the obtained peptide-to-spectrum matches with the contig-based frequencies provided furthermore a measure of enrichment between metaproteomics and metagenomics. Next to nutrient removal (carbohydrate, nitrogen, amino acid metabolism) and growth (translation) also membrane-associated proteins were highly-prominent. An interesting observation was the strong enrichment of porin proteins. These are a beta barrel-forming class of transporters expressed in gram-negative organisms and included fatty acid transporters (*fadL*), small inorganic molecules (*cirA*, *fehA*, *ovp1*) and coenzyme transports (*btuB*). The presence of enriched amounts of membrane proteins, however, did not directly correlate to a potential bias in abundance. For example, the genera *Ca. Competibacter* and *Ca. Propionivibrio* showed strong differences in abundance between metaproteomics and metagenomics but showed little difference in profiles derived from peptide-to-spectrum matches and contig-based frequencies. On the other hand, genera such as *Aquabacterium\_A* and *Azonexus* showed highly-enriched fractions of membrane proteins, but only small differences in relative abundance between the protein and the DNA-based approach. *Ca. Accumulibacter* had an increased difference

with increasing porin protein content (highest in wastewater plant 2), while *Ca. Competibacter* from wastewater plant 1 contained a smaller porin fraction and showed a smaller difference. Species-level differences between samples showed predominantly *Ca. Accumulibacter phosphatis\_G* from wastewater plant 2, *Ca. Accumulibacter phosphatis\_C* from wastewater plant 1 and 3, and a reduced fraction of *Ca. Competibacter denitrificans* from wastewater plant 1. Therefore, observed differences are presumably rather related to phenotypes and species-level variations. For 16S rRNA amplicon data, biases are well-researched and attributed to variations in 16S rRNA gene copy number and primer choice. For example, the increased gene copy number presumably resulted in an overestimation of Firmicutes, while a reduced copy number may have underestimated the abundance of Acidobacteriota and Verrucomicrobiota. The V3–V4 primers used in this study did not efficiently amplify *Chloroflexota* which consequently were only observed at low levels. Planctomycetota were not captured by 16S rRNA amplicon sequencing at all.

## Discussion and conclusions

The application of large-scale ‘omics’ approaches, such as metaproteomics and metagenomics, are increasingly used in microbial ecology and biotechnology. Therefore, efforts have been devoted to standardizing methods in the fields of metagenomics, 16S amplicon sequencing, and metaproteomics. For example, these efforts resulted in the CAMI study for metagenomics [59] and more recently to the CAMPI study for metaproteomics [58]. Both studies aimed to compare methodologies and outcomes between laboratories. While microbiome studies that integrate different types of approaches are rapidly evolving, studies that systematically investigate the orthogonal character of metaproteomics and genomic approaches have rarely been performed [35, 45, 97]. Among the sources that significantly impact variability between studies and approaches are the different reference sequence databases and the employed taxonomies that are used by the different approaches. Database content divergences and inconsistencies, as well as inaccurate taxonomies and nomenclatures can profoundly impact the accuracy of the taxonomic representation and comparisons between studies and techniques. Here, we report on a comparative metaproteomic characterization of the aerobic granular sludge microbiome. We show the divergent views on the central nutrient-removal organisms that can be obtained depending on the chosen ‘omics’ approach and reference sequence databases. Additionally, we demonstrate the uniform application of a ‘homogenized’ genome taxonomy database, which enabled a more accurate interpretation of the orthogonal nature of metaproteomics and the genomic approaches. Ultimately, the performed study demonstrates the importance of metaproteomics for the characterization of complex microbiomes and the application of accurate and uniform reference sequence databases to enhance comparative studies and scientific reporting.

Python codes for constructing and formatting Genome Taxonomy Database (GTDB) entries for the use with Diamond and QIIME are openly accessible via <https://github.com/hbckleikamp/GTDB2DIAMOND> and <https://github.com/hbckleikamp/GTDB2QIIME>. Interactive Krona charts showing the aerobic granular sludge microbiomes from the different wastewater treatment plants as obtained for the different omics approaches are available via the GitHub page [https://pabstm.github.io/Comparative\\_metaproteomics\\_kronas/](https://pabstm.github.io/Comparative_metaproteomics_kronas/).

## ACKNOWLEDGEMENTS

The authors acknowledge Carol de Ram for support with sample preparation, Claudia Tugui and all other colleagues from the department of Biotechnology for valuable discussions, Leanne van Benthem for collection of the granule materials, and the SIAM (Soehngen Institute of Anaerobic Microbiology) consortium for funding.

## CONFLICT OF INTEREST

The authors declare no competing interests.

## ABBREVIATIONS

MG: metagenomics (whole metagenome sequencing)  
MP: metaproteomics  
16S: 16S rRNA gene sequencing  
AGS: aerobic granular sludge  
DXP: Dinxperlo, plant 1 (wastewater treatment plant, The Netherlands)  
GW: Garmerwolde, plant 2 (wastewater treatment plant, The Netherlands)  
SP: Simpelveld, plant 3 (wastewater treatment plant, The Netherlands)  
ASV: amplicon sequence variant  
PSM: peptide-to-spectrum match  
MAG: metagenome assembled genome  
GTDB: genome taxonomy database  
PAO: phosphate-accumulating organisms

1 GAO: glycogen-accumulating organisms  
2 AOB: ammonium-oxidizing bacteria  
3 AOA: ammonium-oxidizing archaea  
4 NOB: nitrate-oxidizing bacteria  
5 NR: nitrate-reducing organisms  
6 EPS: extracellular polymeric substances

## 8 REFERENCES

- 9 1. Cho I, Blaser MJ. The human microbiome: at the interface of health and disease. *Nature Reviews Genetics*. 2012;13:260-70.
- 10 2. Falkowski PG, Fenchel T, Delong EF. The microbial engines that drive Earth's biogeochemical cycles. *science*. 2008;320:1034-9.
- 11 3. Rousk J, Bengtson P. Microbial regulation of global biogeochemical cycles. *Frontiers in microbiology*. 2014;5:103.
- 12 4. Turnbaugh PJ, Ley RE, Hamady M, Fraser-Liggett CM, Knight R, Gordon JI. The human microbiome project. *Nature*. 2007;449:804-10.
- 13 5. Integrative H, Proctor LM, Creasy HH, Fettweis JM, Lloyd-Price J, Mahurkar A, et al. The integrative human microbiome project. *Nature*. 2019;569:641-8.
- 14 6. Angenent LT, Karim K, Al-Dahhan MH, Wrenn BA, Domíguez-Espinosa R. Production of bioenergy and biochemicals from industrial and agricultural wastewater. *TRENDS in Biotechnology*. 2004;22:477-85.
- 15 7. Rabaey K, Verstraete W. Microbial fuel cells: novel biotechnology for energy generation. *TRENDS in Biotechnology*. 2005;23:291-8.
- 16 8. Lovley DR. Happy together: microbial communities that hook up to swap electrons. *The ISME journal*. 2017;11:327-36.
- 17 9. Balcom IN, Driscoll H, Vincent J, Leduc M. Metagenomic analysis of an ecological wastewater treatment plant's microbial communities and their potential to metabolize pharmaceuticals. *F1000Research*. 2016;5.
- 18 10. Tawalbeh M, Al-Othman A, Singh K, Douba I, Kabakebji D, Alkasrawi M. Microbial desalination cells for water purification and power generation: A critical review. *Energy*. 2020;209:118493.
- 19 11. Temudo MF, Muyzer G, Kleerebezem R, van Loosdrecht MC. Diversity of microbial communities in open mixed culture fermentations: impact of the pH and carbon source. *Applied microbiology and biotechnology*. 2008;80:1121-30.
- 20 12. Lawson CE. Retooling Microbiome Engineering for a Sustainable Future. *Msystems*. 2021;6:e00925-21.
- 21 13. Kehe J, Kulesa A, Ortiz A, Ackerman CM, Thakku SG, Sellers D, et al. Massively parallel screening of synthetic microbial communities. *Proceedings of the National Academy of Sciences*. 2019;116:12804-9.
- 22 14. Zhou J, Sun Q. Performance and microbial characterization of aerobic granular sludge in a sequencing batch reactor performing simultaneous nitrification, denitrification and phosphorus removal with varying C/N ratios. *Bioprocess and biosystems engineering*. 2020;43:663-72.
- 23 15. Ramos C, Suárez-Ojeda ME, Carrera J. Long-term impact of salinity on the performance and microbial population of an aerobic granular reactor treating a high-strength aromatic wastewater. *Bioresource technology*. 2015;198:844-51.
- 24 16. de Sousa Rollemberg SL, de Barros AN, Lira VNSA, Firmino PIM, Dos Santos AB. Comparison of the dynamics, biokinetics and microbial diversity between activated sludge flocs and aerobic granular sludge. *Bioresource technology*. 2019;294:122106.
- 25 17. Wu L, Ning D, Zhang B, Li Y, Zhang P, Shan X, et al. Global diversity and biogeography of bacterial communities in wastewater treatment plants. *Nature microbiology*. 2019;4:1183-95.
- 26 18. Zhang T, Shao M-F, Ye L. 454 Pyrosequencing reveals bacterial diversity of activated sludge from 14 sewage treatment plants. *The ISME journal*. 2012;6:1137-47.
- 27 19. Ali M, Wang Z, Salam KW, Hari AR, Pronk M, van Loosdrecht MC, et al. Importance of species sorting and immigration on the bacterial assembly of different-sized aggregates in a full-scale aerobic granular sludge plant. *Environmental science & technology*. 2019;53:8291-301.
- 28 20. Stoddard SF, Smith BJ, Hein R, Roller BR, Schmidt TM. rrn DB: improved tools for interpreting rRNA gene abundance in bacteria and archaea and a new foundation for future development. *Nucleic acids research*. 2015;43:D593-D8.
- 29 21. Starke R, Pylro VS, Morais DK. 16S rRNA gene copy number normalization does not provide more reliable conclusions in metataxonomic surveys. *Microbial ecology*. 2021;81:535-9.
- 30 22. Louca S, Doebeli M, Parfrey LW. Correcting for 16S rRNA gene copy numbers in microbiome surveys remains an unsolved problem. *Microbiome*. 2018;6:1-12.
- 31 23. Brown CT, Hug LA, Thomas BC, Sharon I, Castelle CJ, Singh A, et al. Unusual biology across a group comprising more than 15% of domain Bacteria. *Nature*. 2015;523:208-11.

Comparative metaproteomics, Kleikamp et al., 2022

- 1 24. Albertsen M, Karst SM, Ziegler AS, Kirkegaard RH, Nielsen PH. Back to basics—the influence of DNA extraction and primer  
2 choice on phylogenetic analysis of activated sludge communities. *PLoS one*. 2015;10:e0132783.
- 3 25. Morrissey EM, Mau RL, Schwartz E, Caporaso JG, Dijkstra P, Van Gestel N, et al. Phylogenetic organization of bacterial  
4 activity. *The ISME journal*. 2016;10:2336-40.
- 5 26. Kyte J, Doolittle RF. A simple method for displaying the hydropathic character of a protein. *Journal of molecular biology*.  
6 1982;157:105-32.
- 7 27. Rubio-Rincón F, Weissbrodt D, Lopez-Vazquez C, Welles L, Abbas B, Albertsen M, et al. ‘Candidatus Accumulibacter  
8 delftensis’: A clade IC novel polyphosphate-accumulating organism without denitrifying activity on nitrate. *Water research*.  
9 2019;161:136-51.
- 10 28. Ranjan R, Rani A, Metwally A, McGee HS, Perkins DL. Analysis of the microbiome: Advantages of whole genome shotgun  
11 versus 16S amplicon sequencing. *Biochemical and biophysical research communications*. 2016;469:967-77.
- 12 29. Jansson JK, Hofmockel KS. The soil microbiome—from metagenomics to metaproteomics. *Current opinion in microbiology*.  
13 2018;43:162-8.
- 14 30. Quince C, Walker AW, Simpson JT, Loman NJ, Segata N. Shotgun metagenomics, from sampling to analysis. *Nature*  
15 *biotechnology*. 2017;35:833-44.
- 16 31. Hagen LH, Frank JA, Zamanzadeh M, Eijsink VG, Pope PB, Horn SJ, et al. Quantitative metaproteomics highlight the  
17 metabolic contributions of uncultured phylotypes in a thermophilic anaerobic digester. *Applied and environmental*  
18 *microbiology*. 2017;83.
- 19 32. Wilmes P, Heintz-Buschart A, Bond PL. A decade of metaproteomics: where we stand and what the future holds. *Proteomics*.  
20 2015;15:3409-17.
- 21 33. Wilmes P, Wexler M, Bond PL. Metaproteomics provides functional insight into activated sludge wastewater treatment. *PLoS*  
22 *One*. 2008;3:e1778.
- 23 34. Püttker S, Kohrs F, Benndorf D, Heyer R, Rapp E, Reichl U. Metaproteomics of activated sludge from a wastewater treatment  
24 plant—A pilot study. *Proteomics*. 2015;15:3596-601.
- 25 35. Kleiner M, Thorson E, Sharp CE, Dong X, Liu D, Li C, et al. Assessing species biomass contributions in microbial communities  
26 via metaproteomics. *Nature communications*. 2017;8:1-14.
- 27 36. Heyer R, Kohrs F, Reichl U, Benndorf D. Metaproteomics of complex microbial communities in biogas plants. *Microbial*  
28 *biotechnology*. 2015;8:749-63.
- 29 37. Muth T, Kohrs F, Heyer R, Benndorf D, Rapp E, Reichl U, et al. MPA portable: a stand-alone software package for analyzing  
30 metaproteome samples on the go. *Analytical chemistry*. 2018;90:685-9.
- 31 38. Zorz JK, Sharp C, Kleiner M, Gordon PM, Pon RT, Dong X, et al. A shared core microbiome in soda lakes separated by large  
32 distances. *Nature communications*. 2019;10:1-10.
- 33 39. Kleikamp HB, Pronk M, Tugui C, da Silva LG, Abbas B, Lin YM, et al. Database-independent de novo metaproteomics of  
34 complex microbial communities. *Cell Systems*. 2021.
- 35 40. Kleiner M. Metaproteomics: much more than measuring gene expression in microbial communities. *Msystems*. 2019;4:e00115-  
36 19.
- 37 41. Salvato F, Hettich RL, Kleiner M. Five key aspects of metaproteomics as a tool to understand functional interactions in host-  
38 associated microbiomes. *PLoS Pathogens*. 2021;17:e1009245.
- 39 42. Blakeley-Ruiz JA, Erickson AR, Cantarel BL, Xiong W, Adams R, Jansson JK, et al. Metaproteomics reveals persistent and  
40 phylum-redundant metabolic functional stability in adult human gut microbiomes of Crohn’s remission patients despite  
41 temporal variations in microbial taxa, genomes, and proteomes. *Microbiome*. 2019;7:1-15.
- 42 43. Li Z, Wang Y, Yao Q, Justice NB, Ahn T-H, Xu D, et al. Diverse and divergent protein post-translational modifications in two  
43 growth stages of a natural microbial community. *Nature communications*. 2014;5:1-11.
- 44 44. den Ridder M, Daran-Lapujade P, Pabst M. Shot-gun proteomics: Why thousands of unidentified signals matter. *FEMS yeast*  
45 *research*. 2020;20:foz088.
- 46 45. Narayanasamy S, Muller EE, Sheik AR, Wilmes P. Integrated omics for the identification of key functionalities in biological  
47 wastewater treatment microbial communities. *Microbial biotechnology*. 2015;8:363-8.
- 48 46. Lohmann P, Schäpe SS, Haange S-B, Oliphant K, Allen-Vercoe E, Jehmlich N, et al. Function is what counts: how microbial  
49 community complexity affects species, proteome and pathway coverage in metaproteomics. *Expert review of proteomics*.  
50 2020;17:163-73.
- 51 47. van Loosdrecht MC, Brdjanovic D. Anticipating the next century of wastewater treatment. *Science*. 2014;344:1452-3.
- 52 48. Orhon D, Babuna FG, Karahan O. *Industrial wastewater treatment by activated sludge*: IWA Publishing; 2009.
- 53 49. Liang Z, Tu Q, Su X, Yang X, Chen J, Chen Y, et al. Formation, extracellular polymeric substances, and structural stability of  
54 aerobic granules enhanced by granular activated carbon. *Environmental Science and Pollution Research*. 2019;26:6123-32.

Comparative metaproteomics, Kleikamp et al., 2022

- 1 50. Adav SS, Lee D-J, Lai J-Y. Proteolytic activity in stored aerobic granular sludge and structural integrity. *Bioresource* technology. 2009;100:68-73.
- 2
- 3 51. Panchavinin S, Tobino T, Hara-Yamamura H, Matsuura N, Honda R. Candidates of quorum sensing bacteria in activated sludge
- 4 associated with N-acyl homoserine lactones. *Chemosphere*. 2019;236:124292.
- 5 52. Weissbrodt DG, Neu TR, Kuhlicke U, Rappaz Y, Holliger C. Assessment of bacterial and structural dynamics in aerobic
- 6 granular biofilms. *Frontiers in microbiology*. 2013;4:175.
- 7 53. Weissbrodt DG, Shani N, Holliger C. Linking bacterial population dynamics and nutrient removal in the granular sludge biofilm
- 8 ecosystem engineered for wastewater treatment. *FEMS microbiology ecology*. 2014;88:579-95.
- 9 54. Szabó E, Liébana R, Hermansson M, Modin O, Persson F, Wilén B-M. Comparison of the bacterial community composition
- 10 in the granular and the suspended phase of sequencing batch reactors. *AMB Express*. 2017;7:1-12.
- 11 55. Leventhal GE, Boix C, Kuechler U, Enke TN, Sliwerska E, Holliger C, et al. Strain-level diversity drives alternative community
- 12 types in millimetre-scale granular biofilms. *Nature microbiology*. 2018;3:1295-303.
- 13 56. Welles L, Tian W, Saad S, Abbas B, Lopez-Vazquez C, Hooijmans C, et al. *Accumulibacter* clades Type I and II performing
- 14 kinetically different glycogen-accumulating organisms metabolisms for anaerobic substrate uptake. *Water research*.
- 15 2015;83:354-66.
- 16 57. Azizan A, Kaschani F, Barinas H, Blaskowski S, Kaiser M, Denecke M. Using proteomics for an insight into the performance
- 17 of activated sludge in a lab-scale WWTP. *International Biodeterioration & Biodegradation*. 2020;149:104934.
- 18 58. Van Den Bossche T, Kunath B, Schallert K, Schäpe S, Abraham P, Armengaud J, et al. Critical Assessment of Metaproteome
- 19 Investigation (CAMPPI): A Multi-Lab Comparison of Established Workflows. 2021.
- 20 59. Szczyrba A, Hofmann P, Belmann P, Koslicki D, Janssen S, Dröge J, et al. Critical assessment of metagenome interpretation—
- 21 a benchmark of metagenomics software. *Nature methods*. 2017;14:1063-71.
- 22 60. Yarza P, Yilmaz P, Pruesse E, Glöckner FO, Ludwig W, Schleifer K-H, et al. Uniting the classification of cultured and
- 23 uncultured bacteria and archaea using 16S rRNA gene sequences. *Nature Reviews Microbiology*. 2014;12:635-45.
- 24 61. Konstantinidis KT, Tiedje JM. Towards a genome-based taxonomy for prokaryotes. *Journal of bacteriology*. 2005;187:6258-
- 25 64.
- 26 62. Federhen S. The NCBI taxonomy database. *Nucleic acids research*. 2012;40:D136-D43.
- 27 63. Schoch CL, Ciufo S, Domrachev M, Hotton CL, Kannan S, Khovanskaya R, et al. NCBI Taxonomy: a comprehensive update
- 28 on curation, resources and tools. *Database*. 2020;2020.
- 29 64. Hugenholtz P, Skarshewski A, Parks DH. Genome-based microbial taxonomy coming of age. *Cold Spring Harbor perspectives*
- 30 *in biology*. 2016;8:a018085.
- 31 65. Parks DH, Chuvochina M, Waite DW, Rinke C, Skarshewski A, Chaumeil P-A, et al. A standardized bacterial taxonomy based
- 32 on genome phylogeny substantially revises the tree of life. *Nature biotechnology*. 2018;36:996-1004.
- 33 66. Abbott SL, Janda JM. The genus *Edwardsiella*. *Prokaryotes*. 2006;6:72-89.
- 34 67. McDonald D, Price MN, Goodrich J, Nawrocki EP, DeSantis TZ, Probst A, et al. An improved Greengenes taxonomy with
- 35 explicit ranks for ecological and evolutionary analyses of bacteria and archaea. *The ISME journal*. 2012;6:610-8.
- 36 68. Godfray HCJ. Challenges for taxonomy. *Nature*. 2002;417:17-9.
- 37 69. Parks DH, Chuvochina M, Rinke C, Mussig AJ, Chaumeil P-A, Hugenholtz P. GTDB: an ongoing census of bacterial and
- 38 archaeal diversity through a phylogenetically consistent, rank normalized and complete genome-based taxonomy. *Nucleic acids*
- 39 *research*. 2021.
- 40 70. Chaumeil P-A, Mussig AJ, Hugenholtz P, Parks DH. GTDB-Tk: a toolkit to classify genomes with the Genome Taxonomy
- 41 *Database*. Oxford University Press; 2020.
- 42 71. Parks DH, Chuvochina M, Chaumeil P-A, Rinke C, Mussig AJ, Hugenholtz P. A complete domain-to-species taxonomy for
- 43 *Bacteria and Archaea*. *Nature biotechnology*. 2020;38:1079-86.
- 44 72. Sedlar K, Kupkova K, Provaznik I. Bioinformatics strategies for taxonomy independent binning and visualization of sequences
- 45 in shotgun metagenomics. *Computational and Structural Biotechnology Journal*. 2017;15:48-55.
- 46 73. Lin Y, Wang L, Xu K, Li K, Ren H. Revealing taxon-specific heavy metal-resistance mechanisms in denitrifying phosphorus
- 47 removal sludge using genome-centric metaproteomics. *Microbiome*. 2021;9:1-17.
- 48 74. Tanca A, Palomba A, Fraumene C, Pagnozzi D, Manghina V, Deligios M, et al. The impact of sequence database choice on
- 49 metaproteomic results in gut microbiota studies. *Microbiome*. 2016;4:1-13.
- 50 75. Jouffret V, Miotello G, Culotta K, Ayrault S, Pible O, Armengaud J. Increasing the power of interpretation for soil
- 51 metaproteomics data. *Microbiome*. 2021;9:1-15.
- 52 76. May DH, Timmins-Schiffman E, Mikan MP, Harvey HR, Borenstein E, Nunn BL, et al. An alignment-free ‘metapeptide’
- 53 strategy for metaproteomic characterization of microbiome samples using shotgun metagenomic sequencing. *Journal of*
- 54 *proteome research*. 2016;15:2697-705.



Comparative metaproteomics, Kleikamp et al., 2022

- 1 77. Olson ND, Treangen TJ, Hill CM, Cepeda-Espinoza V, Ghurye J, Koren S, et al. Metagenomic assembly through the lens of  
2 validation: recent advances in assessing and improving the quality of genomes assembled from metagenomes. *Briefings in*  
3 *bioinformatics*. 2019;20:1140-50.
- 4 78. Chen L-X, Anantharaman K, Shaiber A, Eren AM, Banfield JF. Accurate and complete genomes from metagenomes. *Genome*  
5 *research*. 2020;30:315-33.
- 6 79. von Meijenfeldt FB, Arkhipova K, Cambuy DD, Coutinho FH, Dutilh BE. Robust taxonomic classification of uncharted  
7 microbial sequences and bins with CAT and BAT. *Genome biology*. 2019;20:1-14.
- 8 80. Pabst M, Grouzdev DS, Lawson CE, Kleikamp HB, de Ram C, Louwen R, et al. A general approach to explore prokaryotic  
9 protein glycosylation reveals the unique surface layer modulation of an anammox bacterium. *The ISME Journal*. 2021:1-12.
- 10 81. Li W, Godzik A. Cd-hit: a fast program for clustering and comparing large sets of protein or nucleotide sequences.  
11 *Bioinformatics*. 2006;22:1658-9.
- 12 82. Kanehisa M, Sato Y, Morishima K. BlastKOALA and GhostKOALA: KEGG tools for functional characterization of genome  
13 and metagenome sequences. *Journal of molecular biology*. 2016;428:726-31.
- 14 83. Wu S, Zhu Z, Fu L, Niu B, Li W. WebMGA: a customizable web server for fast metagenomic sequence analysis. *BMC*  
15 *genomics*. 2011;12:1-9.
- 16 84. Buchfink B, Xie C, Huson DH. Fast and sensitive protein alignment using DIAMOND. *Nature methods*. 2015;12:59-60.
- 17 85. Edgar RC. UNCROSS: filtering of high-frequency cross-talk in 16S amplicon reads. *Biorxiv*. 2016:088666.
- 18 86. Bolyen E, Rideout JR, Dillon MR, Bokulich NA, Abnet CC, Al-Ghalith GA, et al. Reproducible, interactive, scalable and  
19 extensible microbiome data science using QIIME 2. *Nature biotechnology*. 2019;37:852-7.
- 20 87. Bokulich NA, Kaehler BD, Rideout JR, Dillon M, Bolyen E, Knight R, et al. Optimizing taxonomic classification of marker-  
21 gene amplicon sequences with QIIME 2's q2-feature-classifier plugin. *Microbiome*. 2018;6:1-17.
- 22 88. Nurk S, Meleshko D, Korobeynikov A, Pevzner PA. metaSPAdes: a new versatile metagenomic assembler. *Genome research*.  
23 2017;27:824-34.
- 24 89. Hyatt D, Chen G-L, LoCascio PF, Land ML, Larimer FW, Hauser LJ. Prodigal: prokaryotic gene recognition and translation  
25 initiation site identification. *BMC bioinformatics*. 2010;11:1-11.
- 26 90. Okonechnikov K, Conesa A, García-Alcalde F. Qualimap 2: advanced multi-sample quality control for high-throughput  
27 sequencing data. *Bioinformatics*. 2016;32:292-4.
- 28 91. Langmead B, Salzberg SL. Fast gapped-read alignment with Bowtie 2. *Nature methods*. 2012;9:357-9.
- 29 92. Sims D, Sudbery I, Illott NE, Heger A, Ponting CP. Sequencing depth and coverage: key considerations in genomic analyses.  
30 *Nature Reviews Genetics*. 2014;15:121-32.
- 31 93. Stokholm-Bjerregaard M, McIlroy SJ, Nierychlo M, Karst SM, Albertsen M, Nielsen PH. A critical assessment of the  
32 microorganisms proposed to be important to enhanced biological phosphorus removal in full-scale wastewater treatment  
33 systems. *Frontiers in microbiology*. 2017;8:718.
- 34 94. Welles L, Abbas B, Sorokin DY, Lopez-Vazquez CM, Hooijmans CM, van Loosdrecht M, et al. Metabolic response of  
35 'Candidatus Accumulibacter Phosphatis' clade II C to changes in influent P/C ratio. *Frontiers in microbiology*. 2017;7:2121.
- 36 95. Barr JJ, Dutilh BE, Skennerton CT, Fukushima T, Hastie ML, Gorman JJ, et al. Metagenomic and metaproteomic analyses of  
37 Accumulibacter phosphatis-enriched floccular and granular biofilm. *Environmental microbiology*. 2016;18:273-87.
- 38 96. Singleton CM, Petriglieri F, Kristensen JM, Kirkegaard RH, Michaelsen TY, Andersen MH, et al. Connecting structure to  
39 function with the recovery of over 1000 high-quality metagenome-assembled genomes from activated sludge using long-read  
40 sequencing. *Nature communications*. 2021;12:1-13.
- 41 97. Herold M, Arbas SM, Narayanasamy S, Sheik AR, Kleine-Borgmann LA, Lebrun LA, et al. Integration of time-series meta-  
42 omics data reveals how microbial ecosystems respond to disturbance. *Nature communications*. 2020;11:1-14.
- 43
